# Supplementary material
Source: PubMed Central journal article supplement (PMC5487611)
Supplement: AAC.00223-17_zac007176286s1.pdf [file AAC.00223-17_zac007176286s1.pdf]

1 Supplemental Table 1. Univariable Comparison of Isolates Bearing Both *qacA/B* and *smr*, One  
 2 Gene or Neither *qacA/B* or *smr*.

|                          | <i>qacA/B</i> -<br>positive,<br><i>smr</i> -positive<br>(n=13) | <i>qacA/B</i> -<br>positive, <i>smr</i> -<br>negative<br>(n=66) | <i>qacA/B</i> -<br>negative,<br><i>smr</i> -<br>positive,<br>(n=87) | <i>qacA/B</i> -<br>negative,<br><i>smr</i> -<br>negative,<br>(n=340) | P value |
|--------------------------|----------------------------------------------------------------|-----------------------------------------------------------------|---------------------------------------------------------------------|----------------------------------------------------------------------|---------|
| Age, years (IQR)         | 4.3 (2.3-7.2)                                                  | 2.76 (0.61-10.3)                                                | 1.76 (0.8-5.9)                                                      | 2.4 (1.2-8.2)                                                        | 0.3     |
| Female Gender            | 7 (53.8)                                                       | 27 (40.9)                                                       | 41 (47.2)                                                           | 184 (54.1)                                                           | 0.2     |
| African American<br>Race | 2 (15.4)                                                       | 20 (30.3)                                                       | 23 (26.4)                                                           | 85 (25)                                                              | 0.7     |
| Hispanic Ethnicity       | 5 (38.5)                                                       | 28 (42.4)                                                       | 38 (43.6)                                                           | 165 (48.5)                                                           | 0.6     |
| Underlying<br>Conditions | 6 (46.1)                                                       | 33 (50)                                                         | 37 (42.5)                                                           | 101 (29.7)                                                           | <0.001  |
| Immunocompromised        | 2 (15.4)                                                       | 6 (7.6)                                                         | 9 (10.3)                                                            | 19 (5.6)                                                             | 0.1     |
| Cardiac Disease          | 2 (15.4)                                                       | 6 (9.1)                                                         | 3 (3.4)                                                             | 7 (2.1)                                                              | 0.004   |
| Acquisition              |                                                                |                                                                 |                                                                     |                                                                      | 0.004   |

|                                                                |          |           |           |               |        |
|----------------------------------------------------------------|----------|-----------|-----------|---------------|--------|
| <b>Community-Acquired</b>                                      | 9 (69.2) | 44 (66.7) | 55 (63.2) | 209<br>(79.1) |        |
| <b>Community-Onset</b>                                         | 3 (23.1) | 14 (21.2) | 26 (29.9) | 61 (17.9)     |        |
| <b>Healthcare</b>                                              |          |           |           |               |        |
| <b>Associated</b>                                              |          |           |           |               |        |
| <b>Nosocomial</b>                                              | 1 (7.7)  | 8 (12.1)  | 6 (6.9)   | 10 (2.9)      |        |
| <b>Methicillin-Resistant</b>                                   | 2 (15.4) | 13 (19.7) | 57 (65.5) | 192<br>(56.5) | <0.001 |
| <b>Clindamycin-Resistant</b>                                   | 5 (38.5) | 11 (16.7) | 16 (18.4) | 38 (11.2)     | 0.017  |
| <b>Vancomycin MIC <math>\geq</math> 2 <math>\mu</math>g/ml</b> | 2 (15.4) | 2 (3)     | 3 (3.4)   | 5 (1.4)       | 0.02   |
| <b>Invasive Infection</b>                                      | 5 (38.4) | 20 (30.3) | 24 (27.5) | 63 (18.6)     | 0.03   |
| <b>Hospitalization in Past 3 Months</b>                        | 3 (23.1) | 17 (25.8) | 20 (22.9) | 50 (14.7)     | 0.058  |
| <b>Antibiotic Use in Past 3 Months</b>                         | 5 (38.5) | 30 (45.5) | 52 (59.8) | 154<br>(45.3) | 0.25   |
| <b>Surgery in Past 3 Months</b>                                | 2 (15.4) | 8 (12.1)  | 14 (16.1) | 32 (9.4)      | 0.26   |
| <b>CVL <i>in situ</i></b>                                      | 2 (15.4) | 7 (10.6)  | 8 (9.1)   | 17 (5)        | 0.07   |

|                                                |           |            |           |            |        |
|------------------------------------------------|-----------|------------|-----------|------------|--------|
| <b>Any CHG Use in Past 3 Months</b>            | 3 (23.1)  | 8 (12.1)   | 12 (13.8) | 26 (7.6)   | 0.05   |
| <b>Infection Leading to Hospital Admission</b> | 9 (69.2)  | 28 (42.4)  | 50 (57.4) | 183 (53.8) | 0.17   |
| <b>ICU Admission</b>                           | 2 (15.4)  | 9 (13.6)   | 4 (4.6)   | 13 (3.8)   | 0.007  |
| <b>Length of Stay, days (IQR)</b>              | 10 (4-26) | 7.5 (3-20) | 3 (2-8)   | 2 (1-6)    | <0.001 |
| <b>30 Day Readmission</b>                      | 0         | 2 (3)      | 8 (9.1)   | 8 (2.4)    | 0.04   |
| <b>All Cause Mortality</b>                     | 0         | 1 (1.5)    | 1 (1.1)   | 1 (0.3)    | 0.3    |

3 Continuous variables expressed as medians with interquartile ranges (IQRs). Categorical  
4 variables expressed as n (%).

5

6

7

8

9

10

11

12

13

14 **Supplemental Table 2. Invasive vs. Non-Invasive Infections**

|                                             | <b>Invasive<br/>Infection<br/>(n=112)</b> | <b>Non-<br/>Invasive<br/>Infection<br/>(n=394)</b> | <b>Univariable<br/>P Value</b> | <b>Adjusted<br/>Multivariable<br/>P Value</b> | <b>Odds<br/>Ratio</b> | <b>95%<br/>CI</b> |
|---------------------------------------------|-------------------------------------------|----------------------------------------------------|--------------------------------|-----------------------------------------------|-----------------------|-------------------|
| <b>Age, years</b>                           | 2.6 (0.33-<br>10.4)                       | 2.4 (1.2-<br>7.7)                                  | 0.13                           |                                               |                       |                   |
| <b>Nosocomial<br/>Acquisition</b>           | 23 (20.5)                                 | 2 (0.5)                                            | <0.001                         | 0.018                                         | 10.8                  | 1.78-<br>66.2     |
| <b>Underlying conditions</b>                | 71 (63.4)                                 | 106<br>(26.9)                                      | <0.001                         | 0.014                                         | 2.02                  | 1.15-<br>3.53     |
| <b>Immunocompromised</b>                    | 20 (17.9)                                 | 15 (3.8)                                           | <0.001                         |                                               |                       |                   |
| <b>Cardiac Disease</b>                      | 10 (8.9)                                  | 8 (2)                                              | 0.002                          |                                               |                       |                   |
| <b>CVL</b>                                  | 28 (25)                                   | 4 (1)                                              | <0.001                         | 0.11                                          | 3.5                   | 0.74-<br>16.04    |
| <b>Hospitalization in<br/>Past 3 Months</b> | 52 (46.4)                                 | 38 (9.6)                                           | <0.001                         | 0.02                                          | 2.6                   | 1.20-<br>5.63     |
| <b>Antibiotic Use in Past<br/>3 Months</b>  | 74 (66.1)                                 | 167<br>(42.4)                                      | <0.001                         | 0.89                                          | 0.96                  | 0.55-<br>1.69     |
| <b>Surgery in Past 3<br/>Months</b>         | 31 (27.8)                                 | 25 (6.3)                                           | <0.001                         | 0.27                                          | 1.64                  | 0.67-<br>4.07     |

|                                                                   |           |               |        |      |      |               |
|-------------------------------------------------------------------|-----------|---------------|--------|------|------|---------------|
| <b>Either Tolerance Gene</b>                                      | 49 (43.8) | 117<br>(29.6) | 0.006  | 0.39 | 1.24 | 0.75-<br>2.09 |
| <b><i>smr</i>-Positive</b>                                        | 29 (25.9) | 71 (18)       | 0.08   |      |      |               |
| <b><i>qacA/B</i>-Positive</b>                                     | 25 (22.3) | 54 (13.7)     | 0.03   |      |      |               |
| <b>Any CHG Exposure in<br/>Past 3 Months</b>                      | 34 (30.3) | 15 (3.8)      | <0.001 | 0.83 | 1.1  | 0.37-<br>3.24 |
| <b>Methicillin-resistance</b>                                     | 48 (42.8) | 216<br>(54.8) | 0.03   | 0.32 | 0.77 | 0.47-<br>1.28 |
| <b>Vancomycin MIC <math>\geq</math><br/>2<math>\mu</math>g/ml</b> | 4 (3.5)   | 8 (2)         | 0.3    |      |      |               |

15

16
